# Supplementary material
Source: publisher figshare collection journal article supplement (https://acs.figshare.com/ndownloader/files/3935176)

# **Mechanical and Electronic Properties of $\pi$ -Conjugated Metal Bis(dithiolene) Complex Sheets**

**Fazel Shojaei, Jae Ryang Hahn**

Department of Chemistry and Bioactive Material Sciences and Research Institute of  
Physics and Chemistry, Jeonbuk National University, Jeonju, Chonbuk 561-756,  
Republic of Korea

**Hong Seok Kang<sup>\*</sup>**

Department of Nano and Advanced Materials, College of Engineering, Jeonju  
University, Hyoja-dong, Wansan-ku, Chonju, Chonbuk 560-759, Republic of Korea

\*Corresponding author: [\*\*hsk@jj.ac.kr\*\*](mailto:hsk@jj.ac.kr)

**FIGURE S1**  $\pi$ -component of the PDOS plots of one of sulfur (a-c) and carbon (d-f) atoms which are directly bonded to each other, i.e.,  $p_z(\text{S})$  and  $p_z(\text{C})$  at various isotropic strains: 0% (a,d), 6% (b,e), and 12% (c,f).

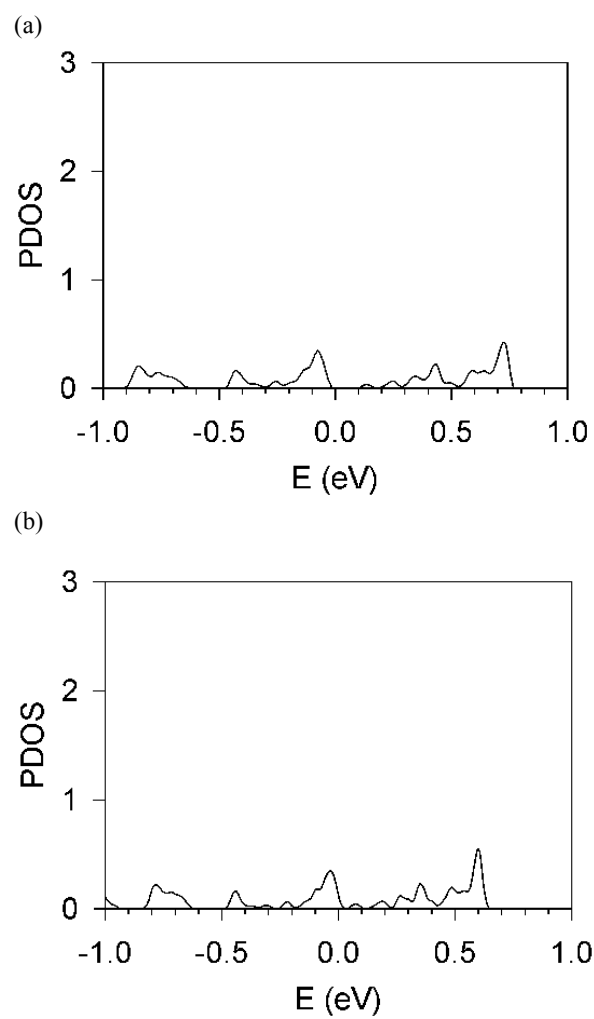

(c)

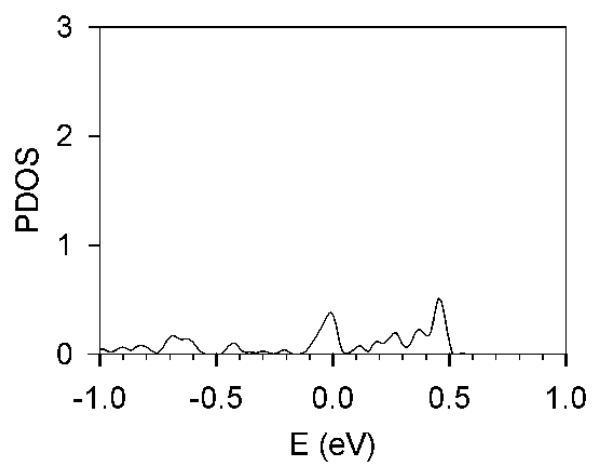

(d)

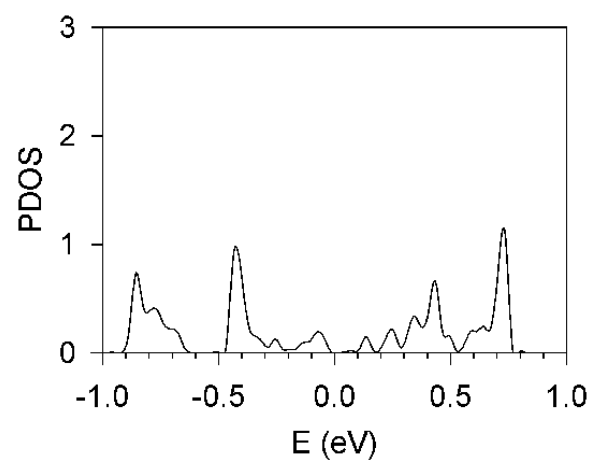

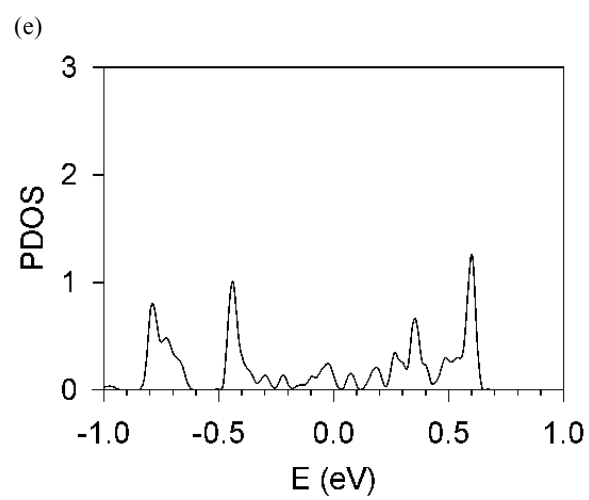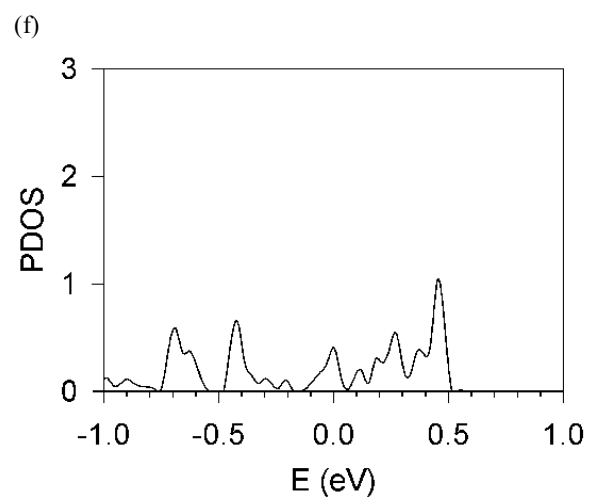

Supplement: Supplementary file 1 [file 3935176]
